# Supplementary material for: Concise diastereoselective synthesis of calcaripeptide C via asymmetric transfer hydrogenation/Pd-induced chiral allenylzinc as a key reaction
Source: Royal Society of Chemistry journal article supplement (doi:10.1039/c5ob01164g), 2015-01-01

## Electronic Supplementary Information (ESI)

### Concise Diastereoselective Synthesis of Calcaripeptide C via asymmetric transfer hydrogenation / Pd-induced Chiral Allenylzinc as a Key Reaction

Gullapalli Kumaraswamy,\* Vykunthapu Narayanarao and Ragam Raju

S2      **General Information**

S3– S14    **<sup>1</sup>H NMR and <sup>13</sup>CNMR Spectra's**

**General information** :All reactions were conducted under an inert atmosphere. Apparatus used for reactions were oven dried. THF was distilled over sodium benzophenone ketyl before use and DCM distilled over calcium hydride. (*S*)-But-3-yn-2-yl methanesulfonate was prepared according to the reported procedure. All other chemicals used were commercially available. Progress of the reactions was monitored by TLC on pre-coated silica gel 60 F-254. Evaporation of solvents was performed at reduced pressure on a rotary evaporator. Column chromatography was carried out with silica gel grade 60-120 and 100-200 mesh. <sup>1</sup>H NMR spectra were recorded at 300 & 500 MHz and <sup>13</sup>C NMR 75 MHz in CDCl<sub>3</sub>. Chemical shifts (δ) are reported in ppm. Tetramethylsilane (δ = 0.00 ppm for <sup>1</sup>H) and CDCl<sub>3</sub> (δ = 77.00 ppm for <sup>13</sup>C) were used as the internal standard. Scalar coupling constants (*J*) are reported in hertz (Hz). The following abbreviations are used to designate the multiplicities: s = singlet, d = doublet, t = triplet, dd = doublet of doublet, ddd = doublet of doublet of doublet, m = multiplet, br.s = broad singlet. Mass spectral data were compiled using MS (ESI), and High resolution mass spectra (HRMS) were recorded by ESI probe in positive mode using ORBITRAP analyzer. Optical rotations were recorded on high sensitive polarimeter with 1mL cell.

**<sup>1</sup>H NMR of 10:**

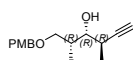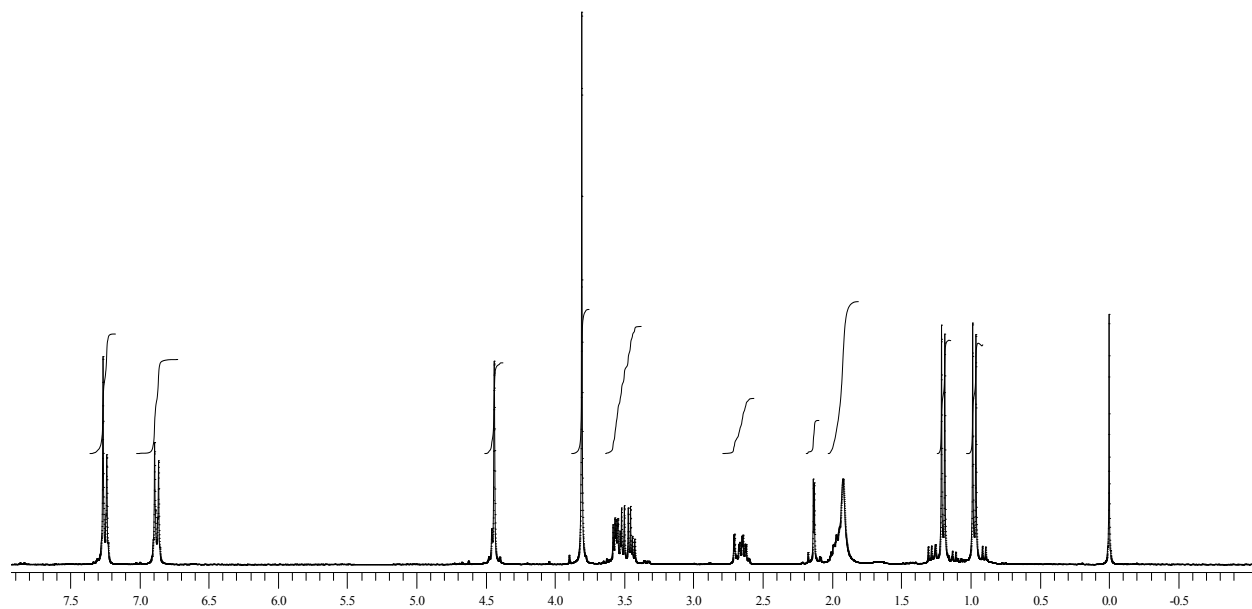

**<sup>13</sup>C NMR of 10:**

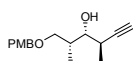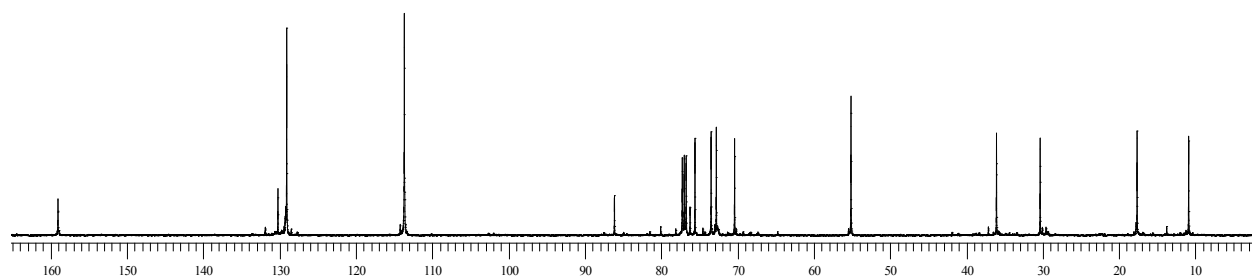

**<sup>1</sup>H NMR of 11:**

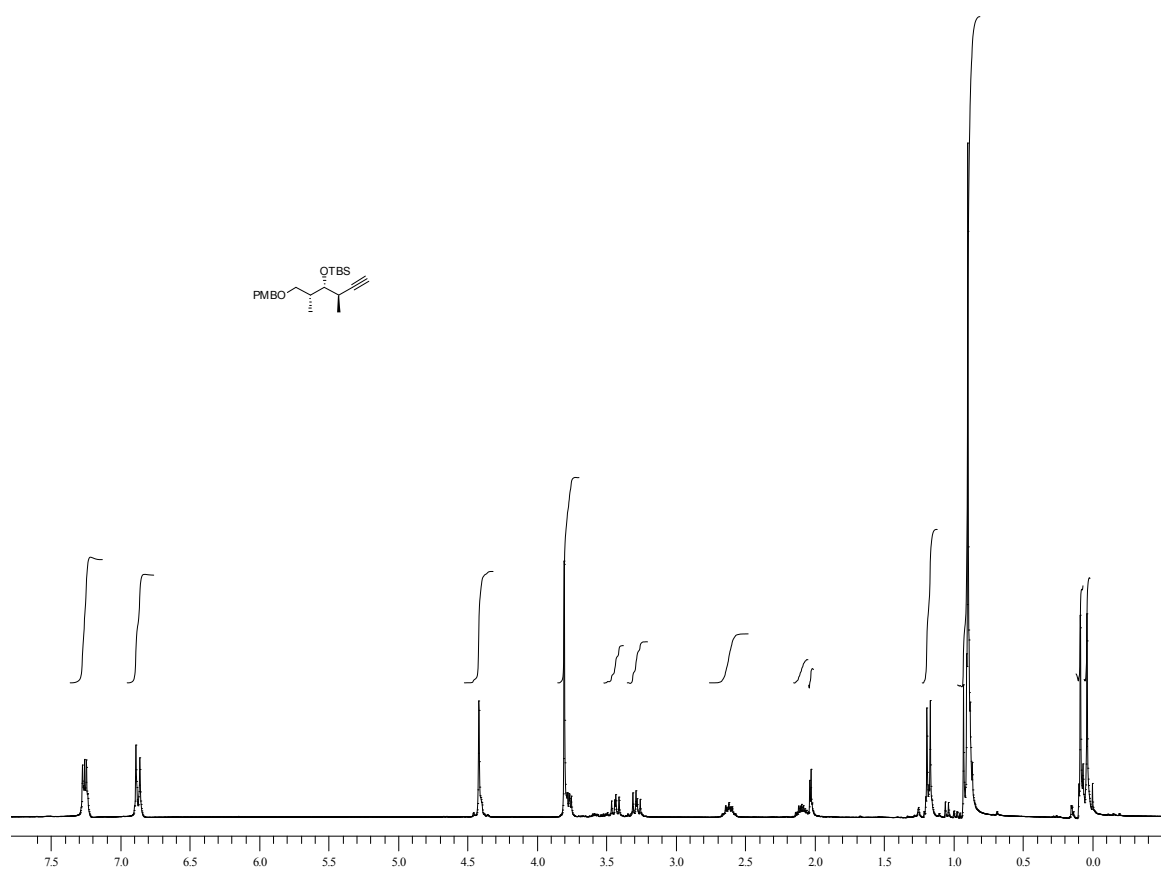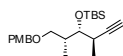

**<sup>13</sup>C NMR of 11:**

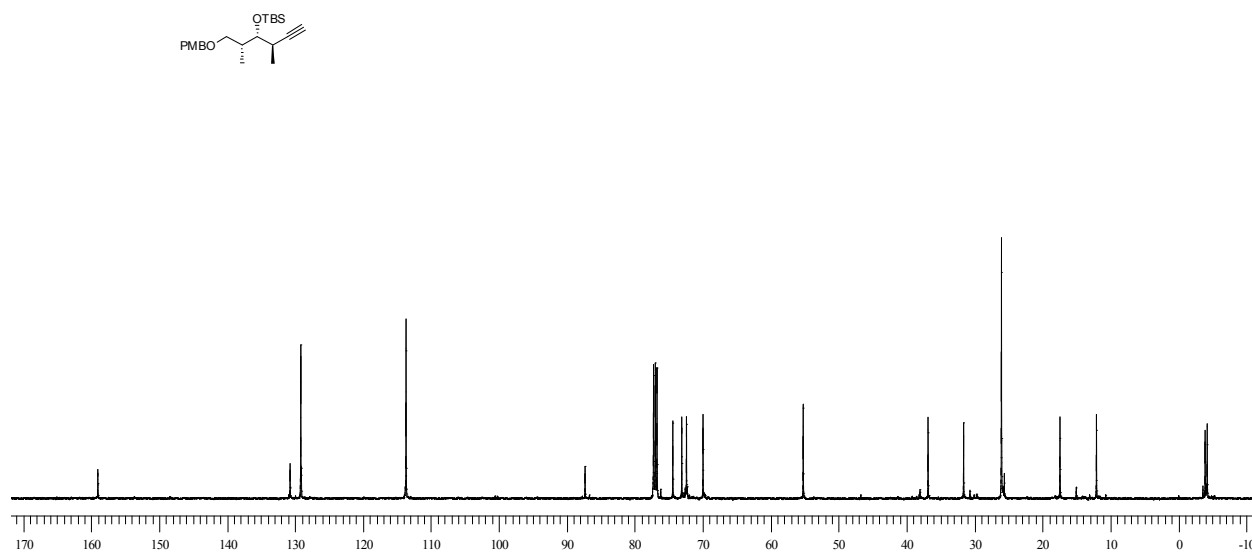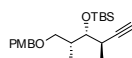

**<sup>1</sup>H NMR of 6:**

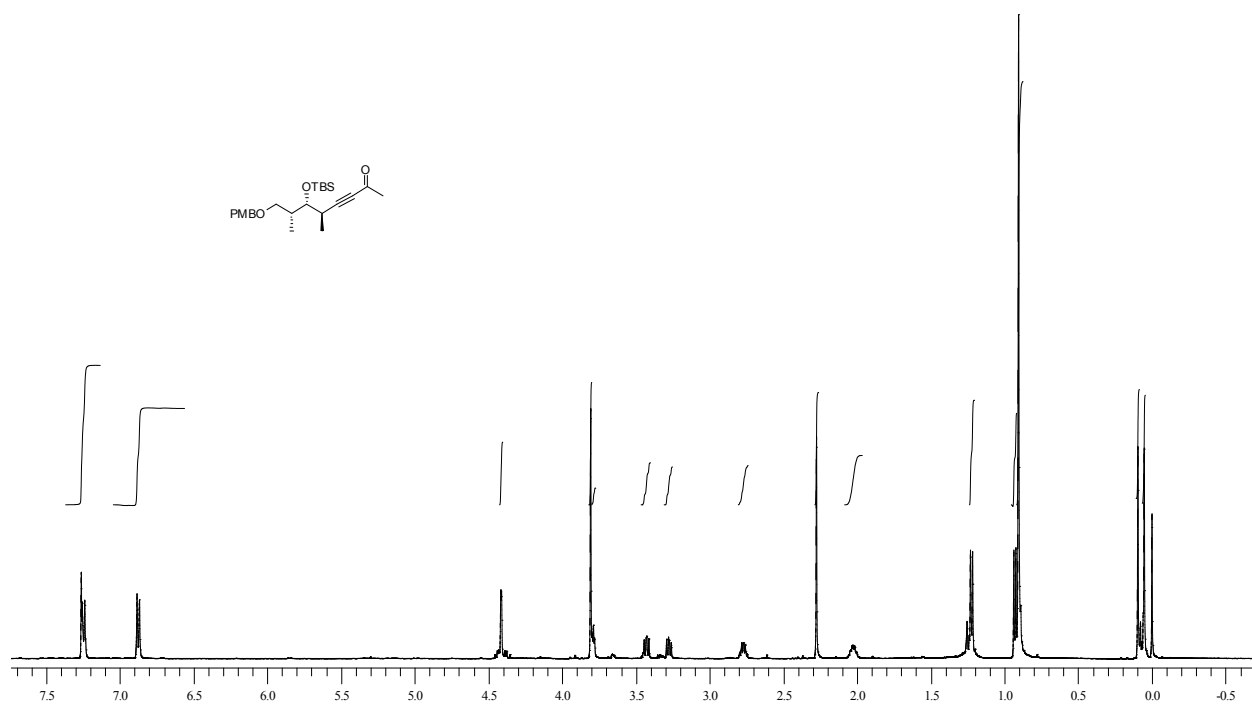

**<sup>13</sup>C NMR of 6:**

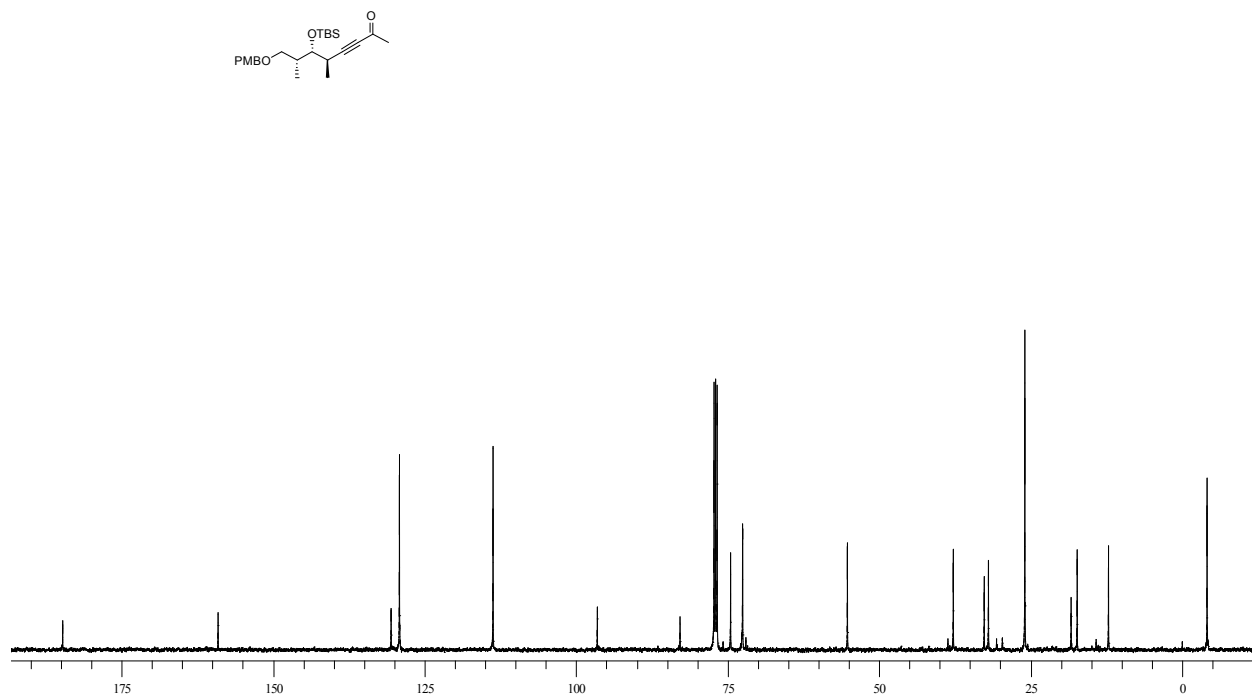

**<sup>1</sup>H NMR of 12:**

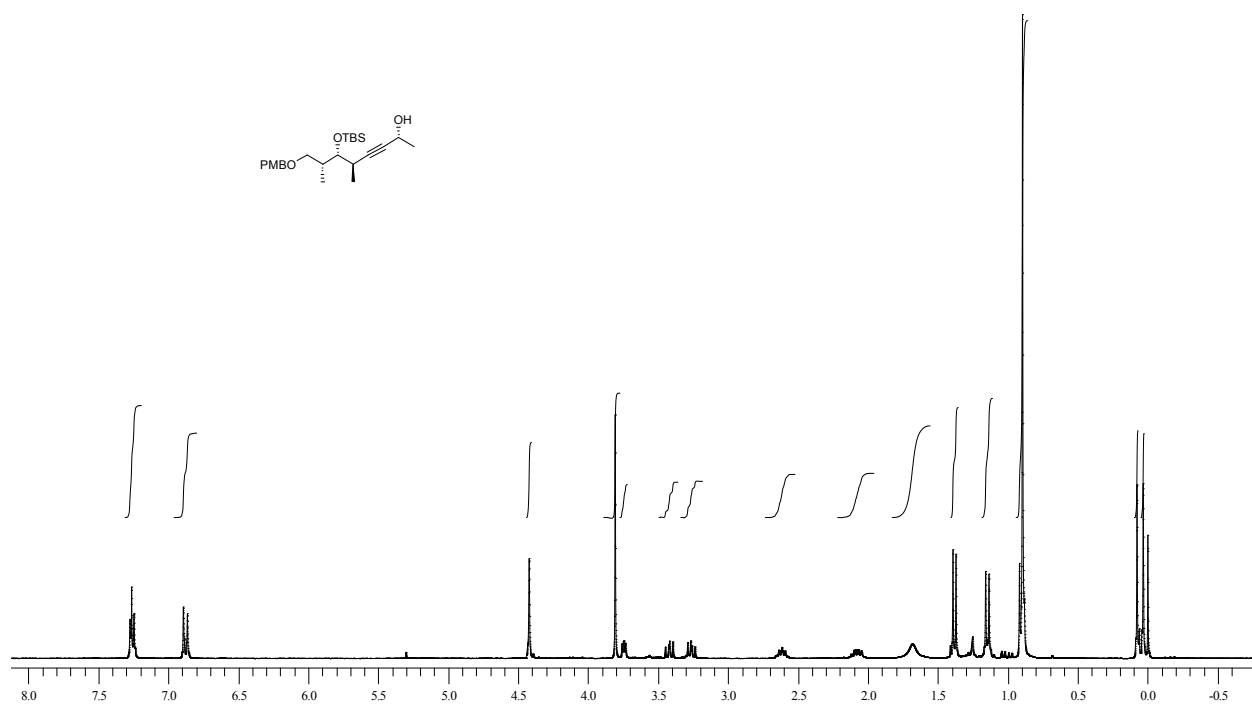

**<sup>13</sup>C NMR of 12:**

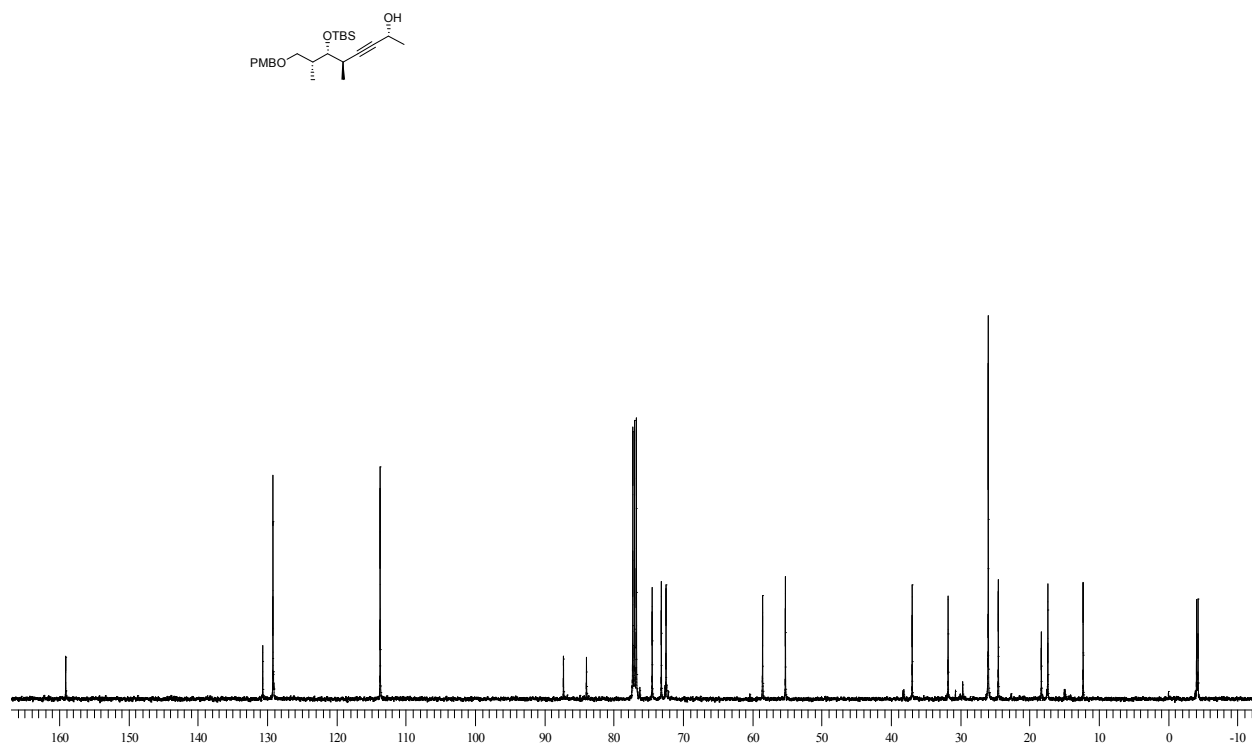

**<sup>1</sup>H NMR of 12a:**

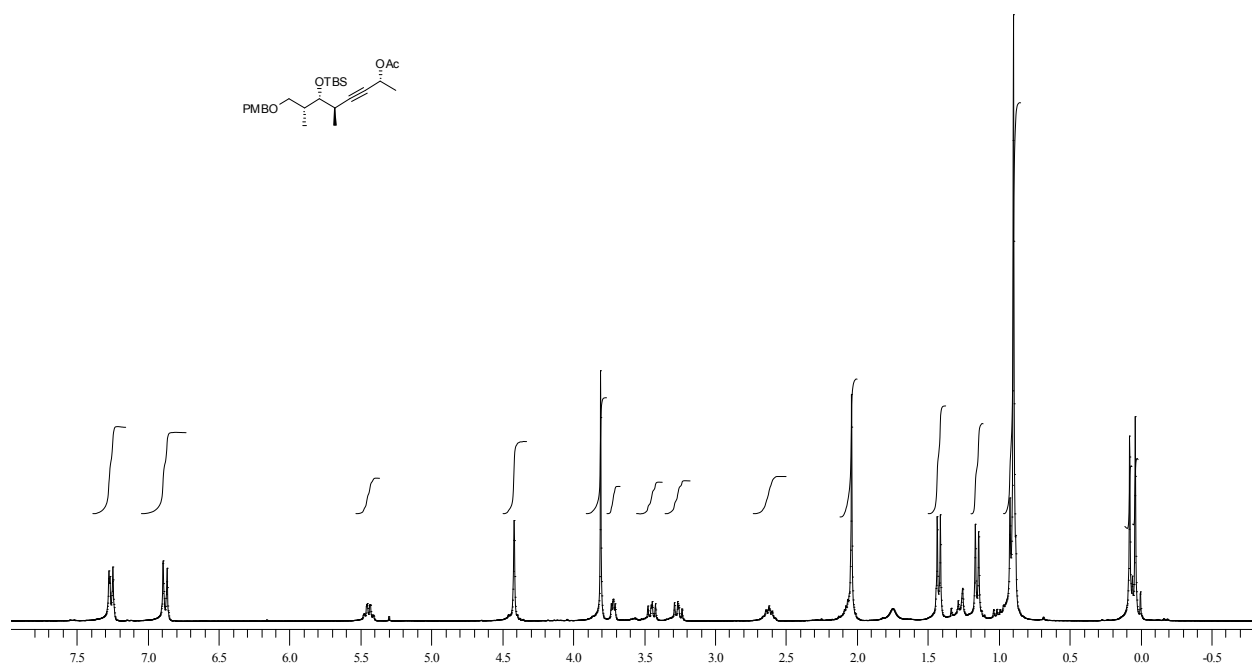

**<sup>13</sup>C NMR of 12a:**

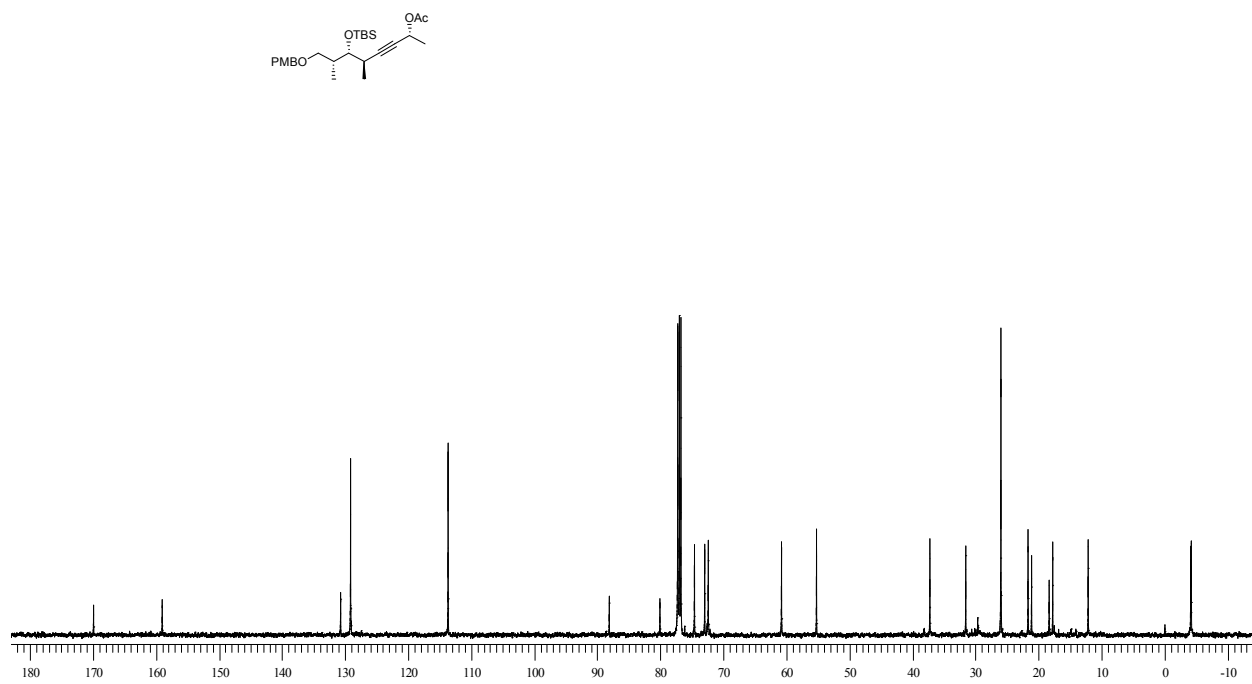

**<sup>1</sup>H NMR of 13:**

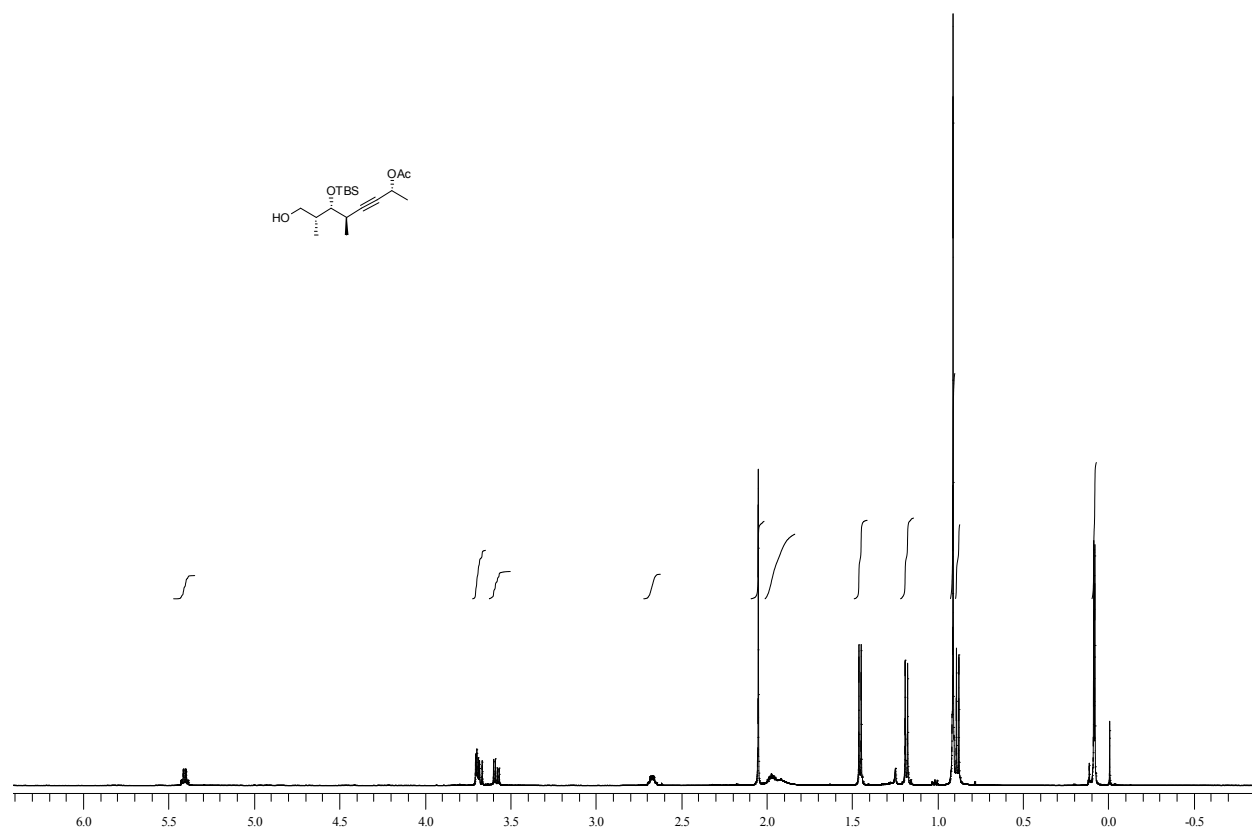

**<sup>13</sup>C NMR of 13:**

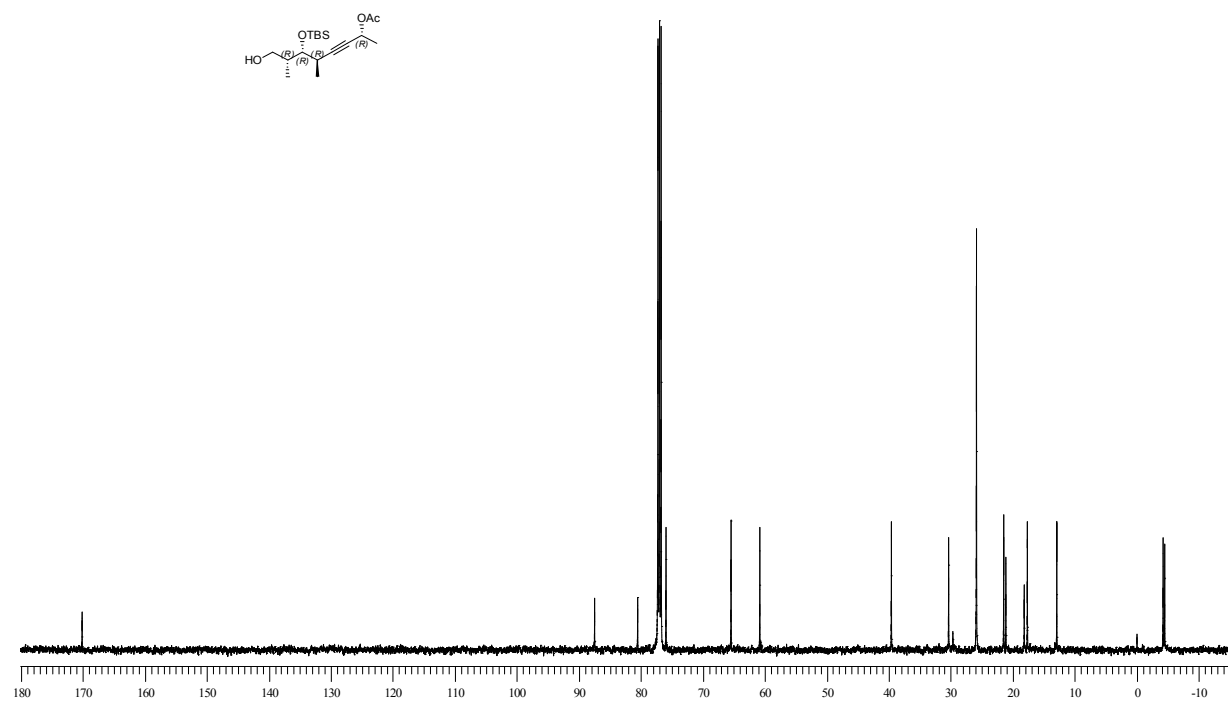



**<sup>1</sup>H NMR of 14:**

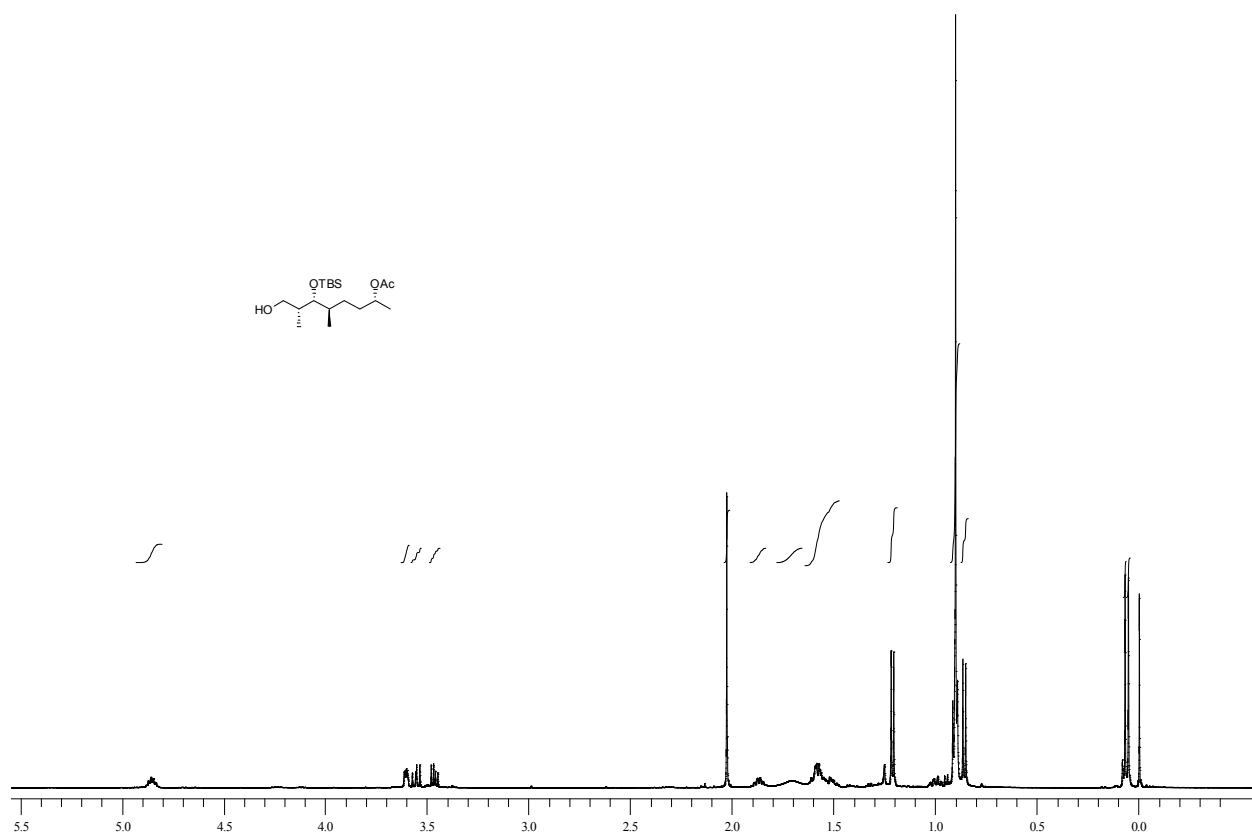

**<sup>13</sup>C NMR of 14:**

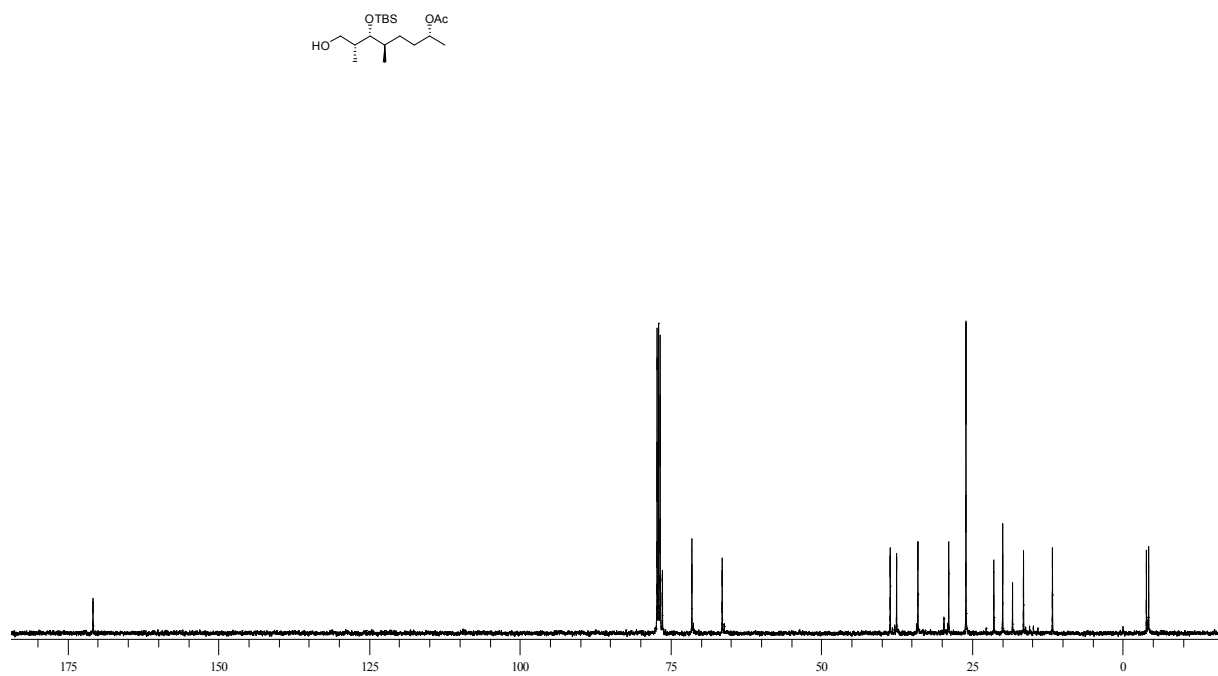

**<sup>1</sup>H NMR of 15:**

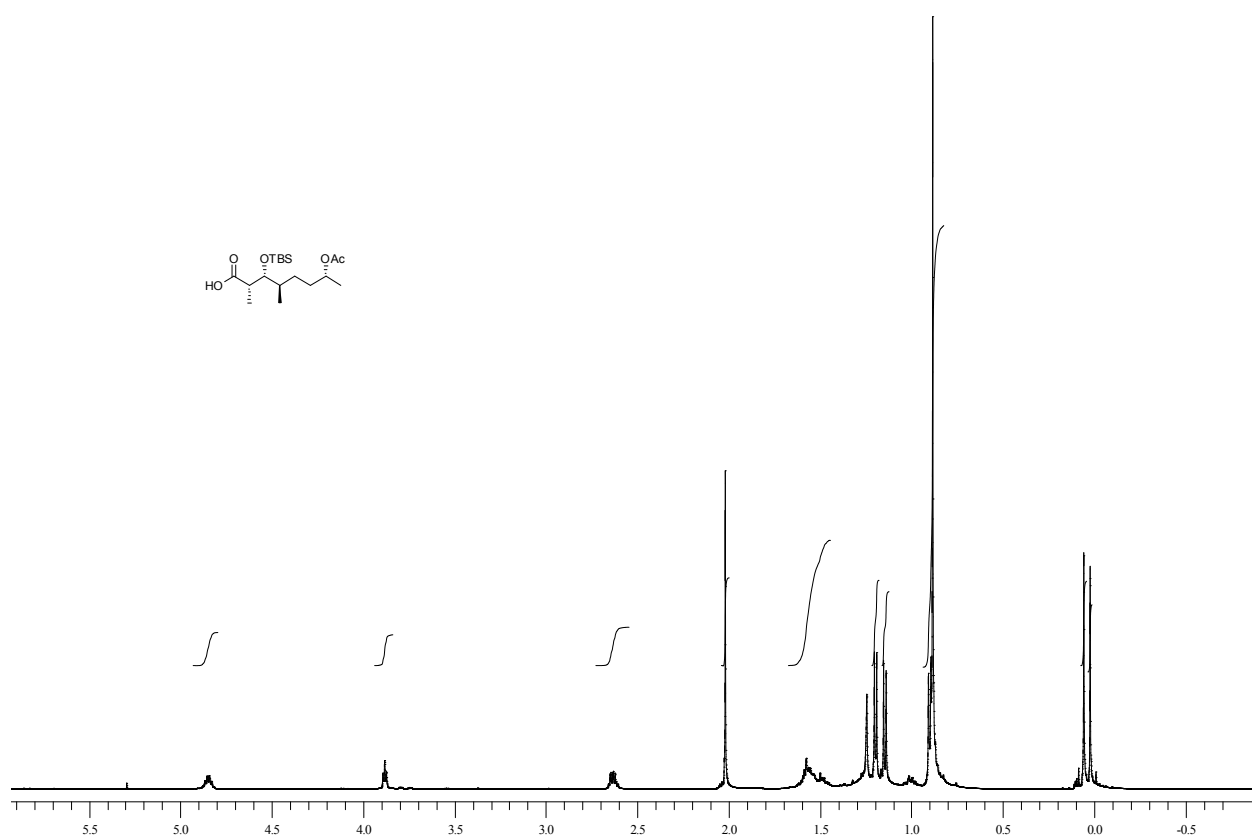

**<sup>13</sup>C NMR of 15:**

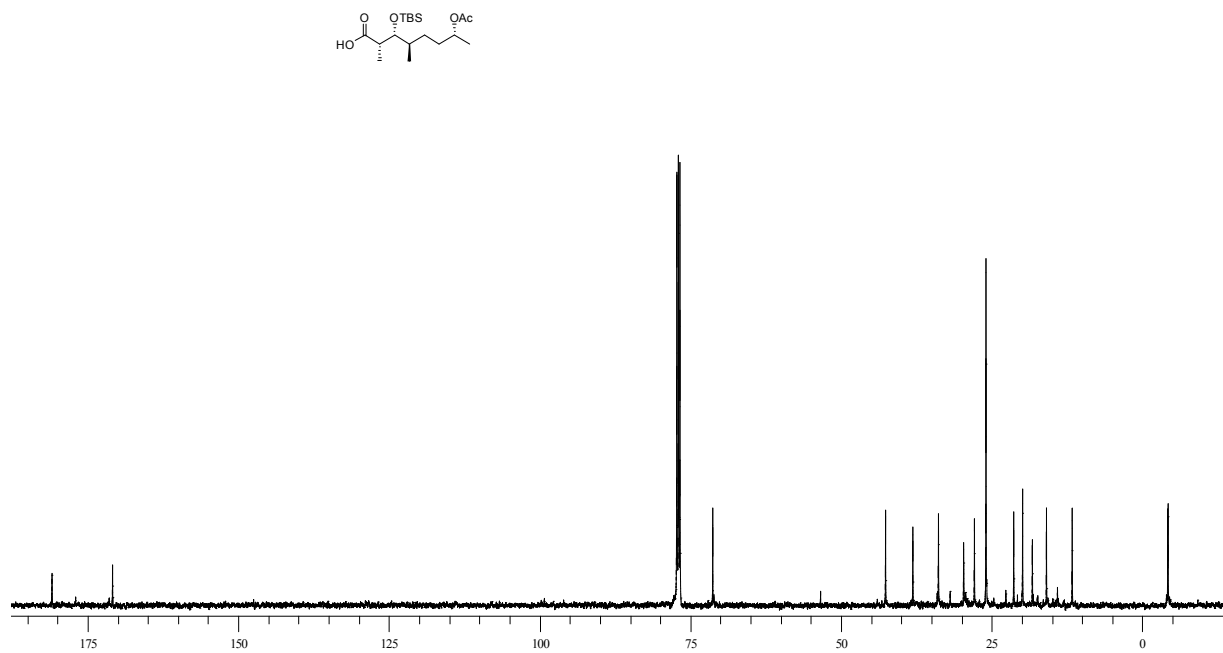

**<sup>1</sup>H NMR of 16:**

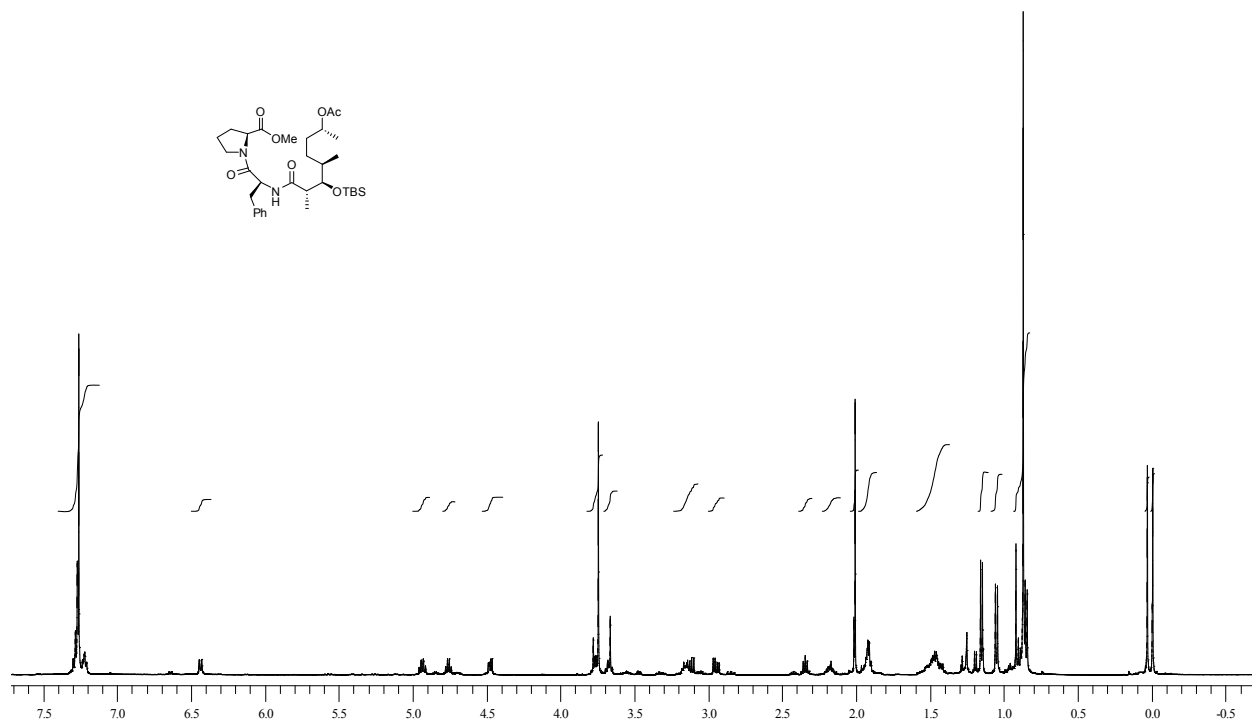

**<sup>13</sup>C NMR of 16:**

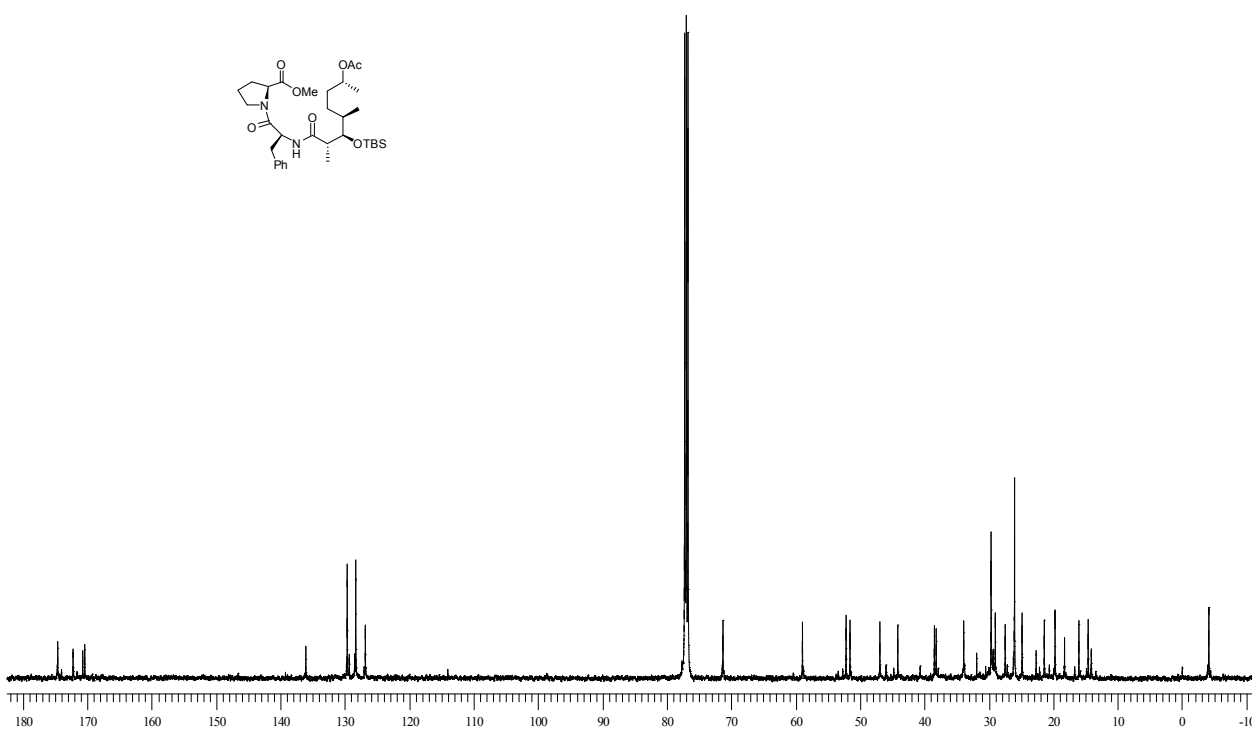

**<sup>1</sup>H NMR of 17:**

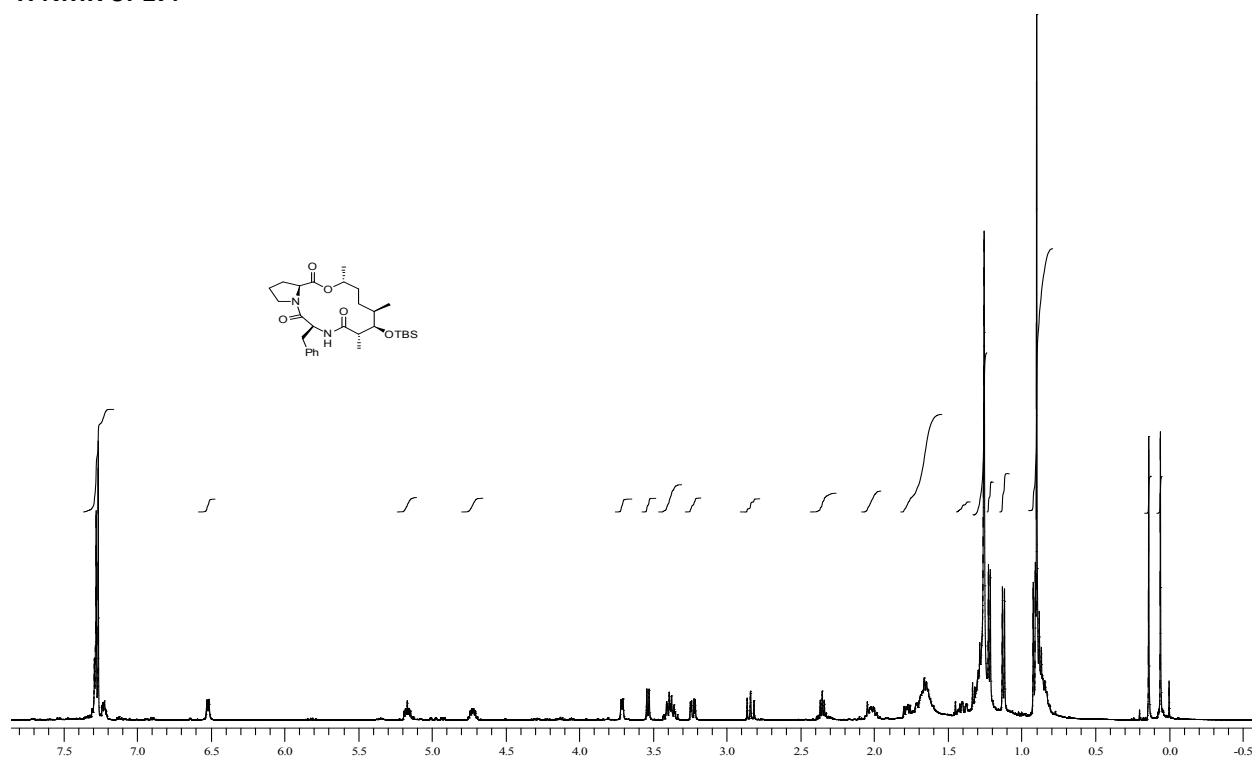

**<sup>13</sup>C NMR of 17:**

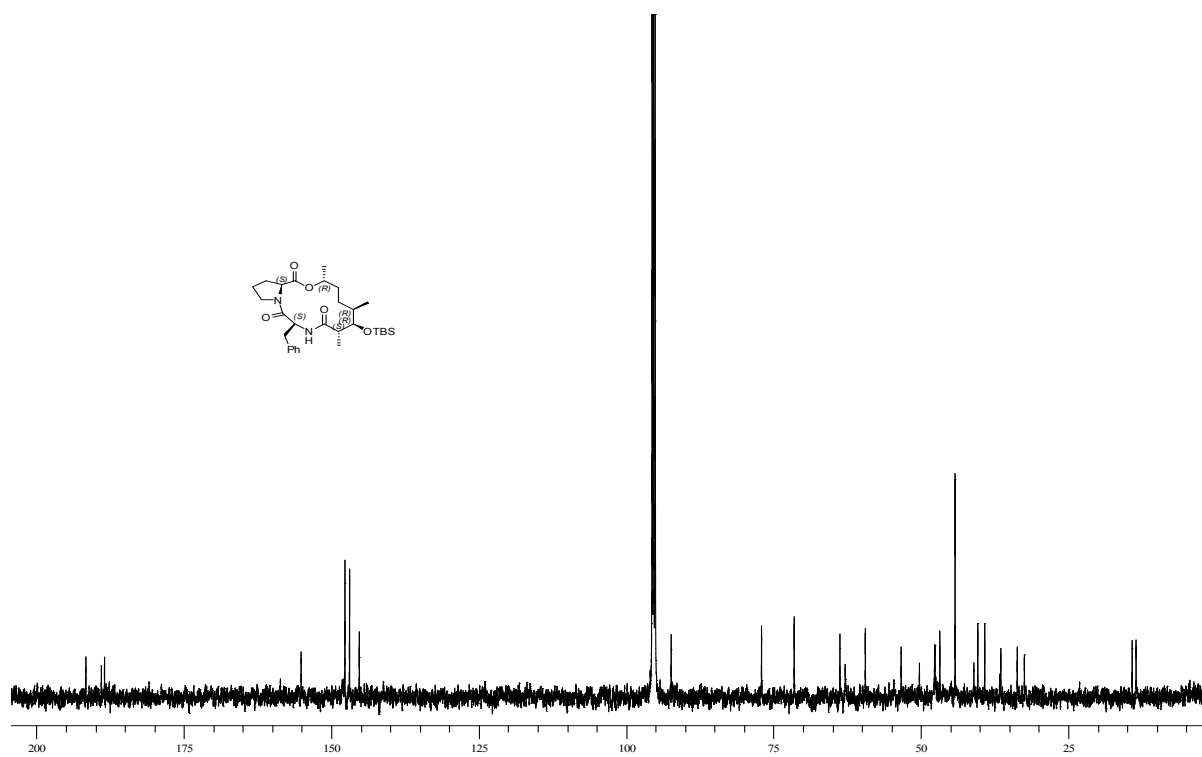

**<sup>1</sup>H NMR 17a:**

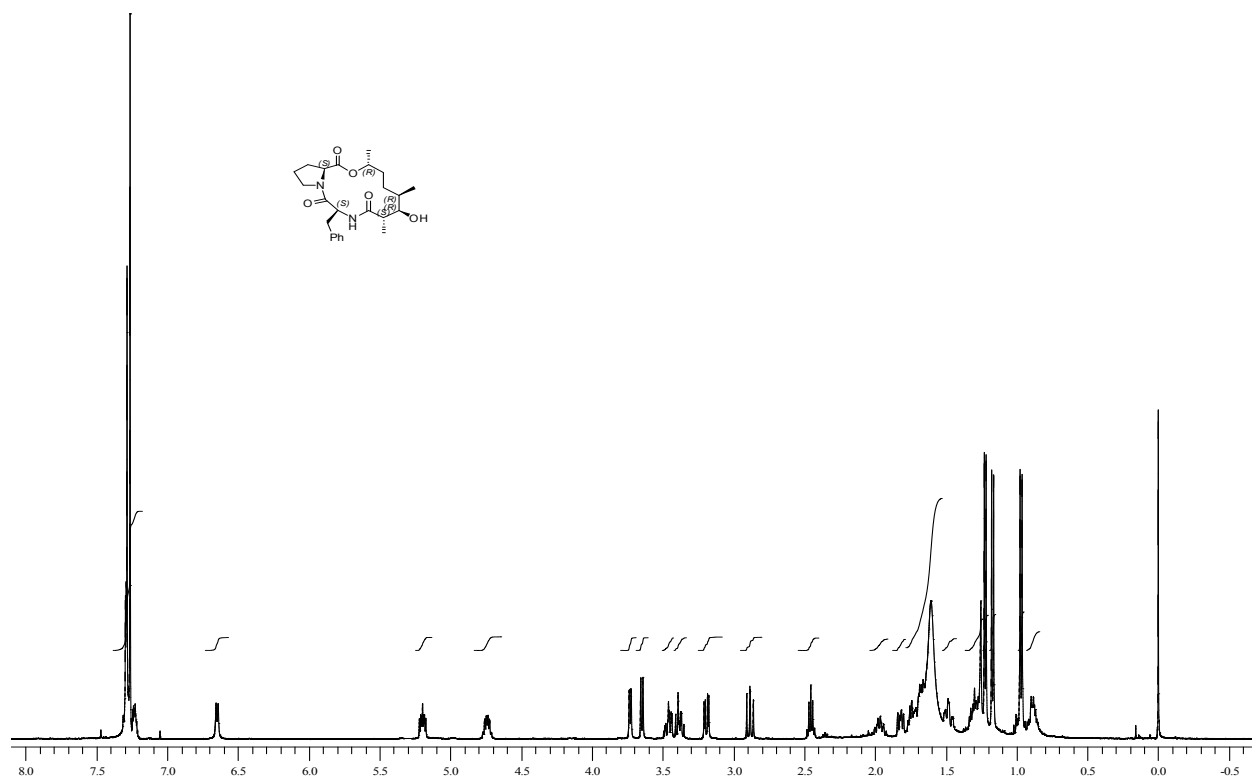

**<sup>13</sup>C NMR 17a:**

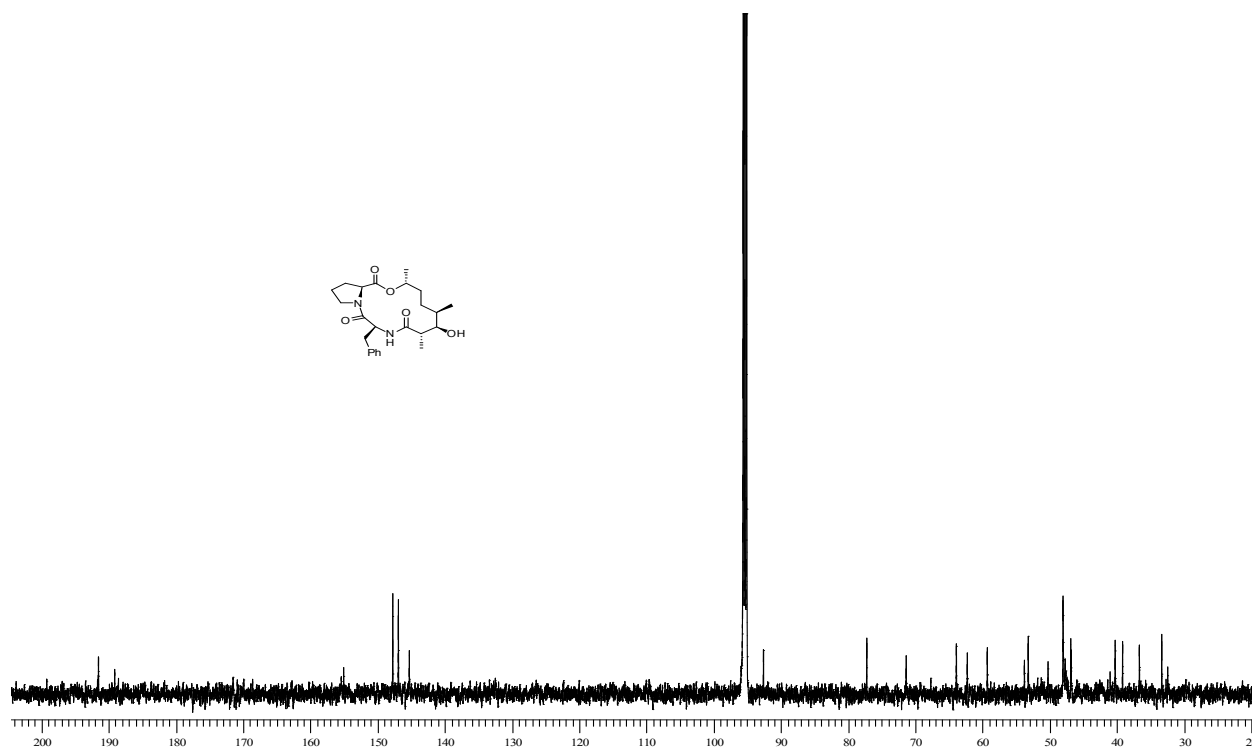

**<sup>1</sup>H NMR of 3:**

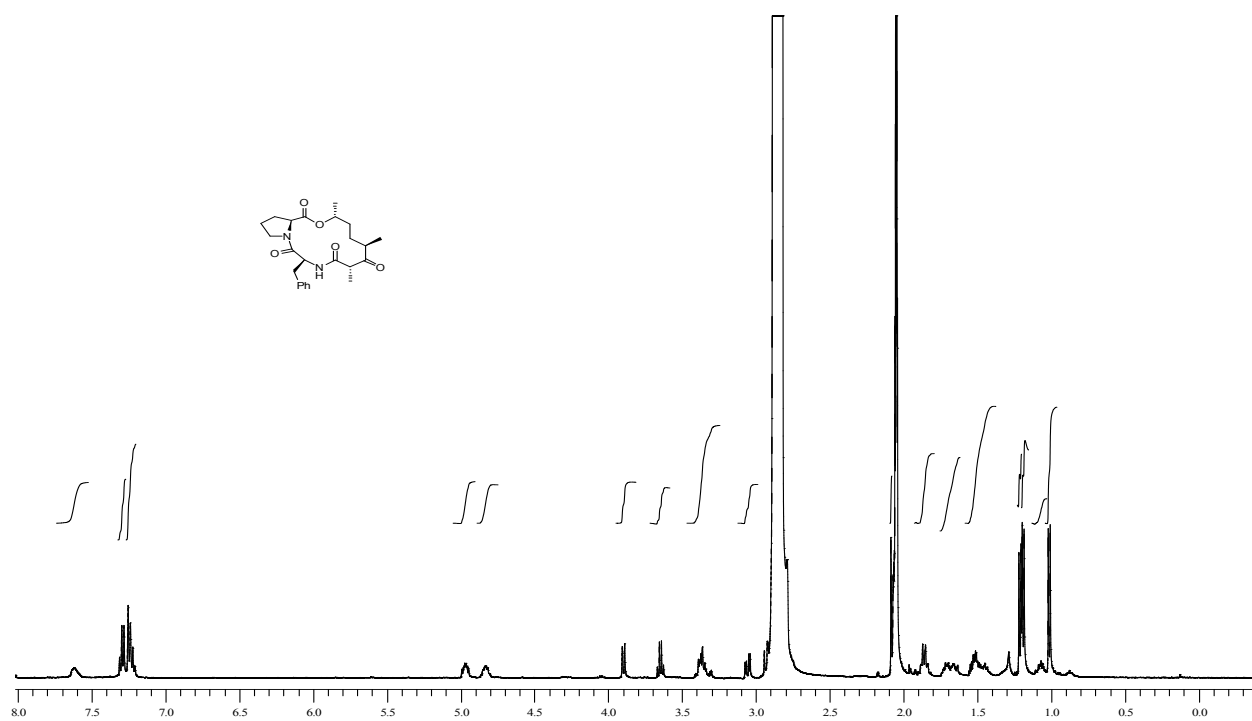

**<sup>13</sup>C NMR of 3:**

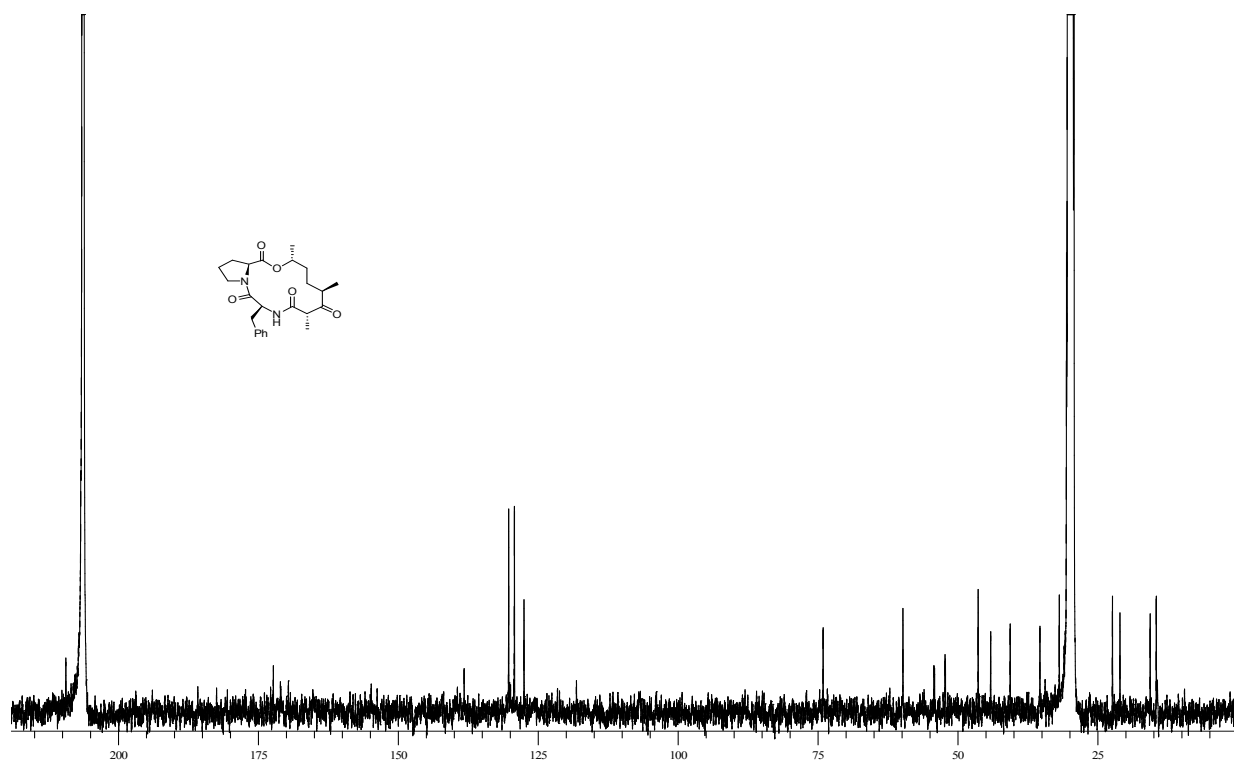

Supplement: c5ob01164g1.pdf [file c5ob01164g1.pdf]
